# Supplementary material
Source: PubMed Central journal article supplement (PMC7408237)
Supplement: ao0c02529_si_001.pdf [file ao0c02529_si_001.pdf]

## **Supporting Information**

### ***Insight into the loading and release properties of exfoliated kaolinite/cellulose composite (EXK/CF) as a carrier for Oxaliplatin drug; cytotoxicity and release kinetics***

**Lijun Tian<sup>†</sup>, Mostafa R. Abukhadra<sup>\*†,§</sup>, Aya S. Mohamed<sup>§,ξ</sup>, Ahmed Nadeem<sup>\*</sup>, Sheikh F. Ahmad<sup>\*</sup>, Khalid E. Ibrahim<sup>&</sup>**

<sup>†</sup>Deputy Chief Physician, Shanxi Provincial People's Hospital, Taiyuan City, Shanxi Province, China

<sup>\*</sup>Geology Department, Faculty of Science, Beni-Suef University, Beni –Suef city, Egypt

<sup>§</sup>Materials Technologies and their Applications Lab, Geology Department, Faculty of Science, Beni-Suef University, Beni-Suef City, Egypt.

<sup>ξ</sup>Department of Environment and Industrial Development, Faculty of postgraduate studies for advanced sciences

<sup>\*</sup>Department of Pharmacology & Toxicology, College of Pharmacy, King Saud University, Riyadh, Saudi Arabia

<sup>&</sup>Department of Zoology, College of Science, King Saud University, Riyadh, Saudi Arabia

## **Content**

1. Table.S1. the representative equations of the studied kinetic and isotherm model and their parameters.....S2

# 1. Representative equation of kinetic and equilibrium models

**Table S1.** the representative equations of the studied kinetic and isotherm model and their parameters

| Kinetic models        |                                                                                                                                                                      |                                                                                                                                                                         |
|-----------------------|----------------------------------------------------------------------------------------------------------------------------------------------------------------------|-------------------------------------------------------------------------------------------------------------------------------------------------------------------------|
| Model                 | Linear equation                                                                                                                                                      | Parameters                                                                                                                                                              |
| Pseudo-first-order    | $\ln (q_e - q_t) = \ln q_e - k_1 t$                                                                                                                                  | $q_t$ (mg/g) is the adsorbed drug at time (t), and $K_1$ is the rate constant of the first-order adsorption ( $\text{min}^{-1}$ )                                       |
| Pseudo-second-order   | $\frac{t}{q_t} = \frac{1}{K_2 q_e^2} + \frac{t}{q_e}$                                                                                                                | $q_e$ is the quantity of adsorbed drug after equilibration (mg/g), and $K_2$ is Lagergren model rate constant (g/mg min).                                               |
| Isotherm models       |                                                                                                                                                                      |                                                                                                                                                                         |
| Model                 | Equation                                                                                                                                                             | Parameters                                                                                                                                                              |
| Langmuir              | $\frac{C_e}{q_e} = \frac{1}{b q_{max}} + \frac{C_e}{q_{max}}$ (Linear)                                                                                               | $C_e$ is the rest drug concentrations (mg/L), $q_{max}$ is the theoretical maximum ibuprofen drug capacity (mg/g), and $b$ is the Langmuir constant (L/mg)              |
| Freundlich            | $q_e = \frac{q_{max} b C_e}{(1 + b C_e)}$ (Nonlinear)<br>$\text{Log } q_e = (1/n) \text{ log } C_e + \text{ log } K_f$ (Linear)<br>$q_e = K_f C_e^{1/n}$ (Nonlinear) | $K_f$ is the constant of Freundlich model related to the adsorption capacity and $n$ is the constant of Freundlich model related to the adsorption intensities          |
| Dubinini–Radushkevich | $\ln (q_e) = \ln (q_m) - \beta \varepsilon^2$ (Linear)<br>$q_e = q_m e^{-\beta \varepsilon^2}$ (Nonlinear)                                                           | $\beta$ ( $\text{mol}^2/\text{KJ}^2$ ) is the D-R constant, $\varepsilon$ ( $\text{KJ}^2/\text{mol}^2$ ) is the polanyi potential, and $q_m$ is the adsorption capacity |
